# Supplementary material
Source: PubMed Central journal article supplement (PMC2628467)
Supplement: NIHMS80294-supplement-01.pdf [file NIHMS80294-supplement-01.pdf]

### **Supplemental data**

Zheng Zhou, Hanqiao Feng, Rodolfo Ghirlando, and Yawen Bai

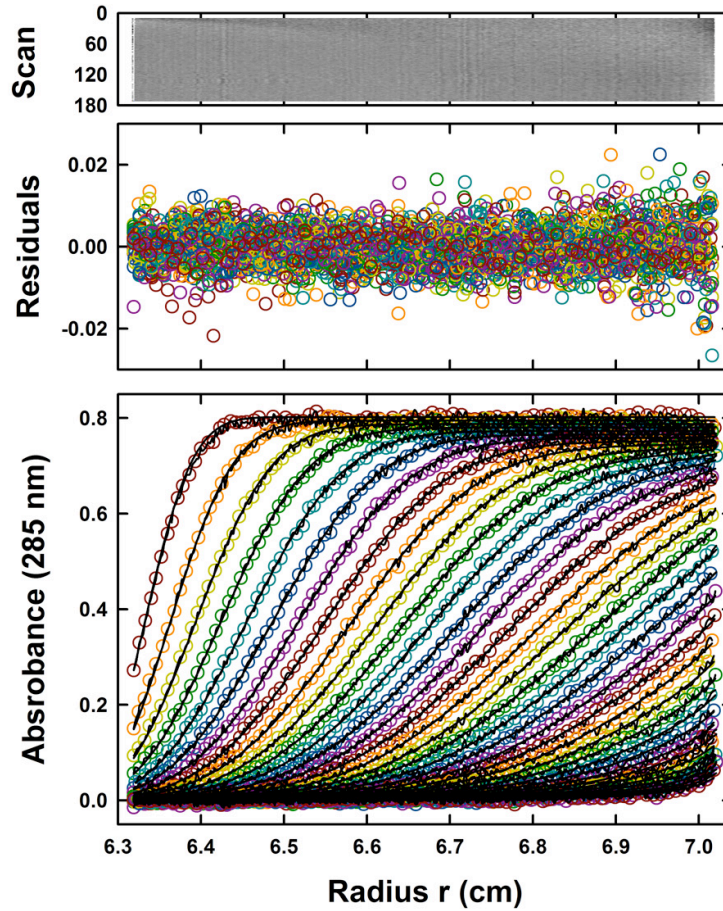

**Figure S1: Sedimentation velocity experiments.** Sedimentation velocity profiles at 60 krpm and 20.0°C obtained at a loading concentration of 28.6  $\mu\text{M}$  showing the absorbance at 285 nm *versus* the radius (lower panel). For clarity, scans are shown at 14 minute intervals or every fifth scan. Furthermore, only every third experimental data point is shown. The solid lines are best-fit curves to a single species corresponding to the monomeric intermediate mimic. The pooled residuals to this fit are also shown (middle panel), together with a bitmap representation of the residuals to the single species fit for all 180 scans (top panel).

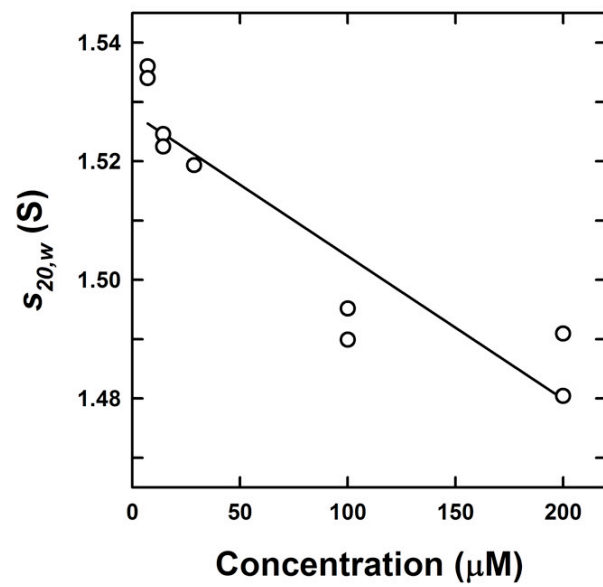

**Figure S2: The intermediate mimic of RNase H is a monodisperse monomer.** Dependence of the sedimentation coefficient obtained from a single discrete species analysis as a function of the loading concentration. The best linear fit to the data shown returns a zero concentration sedimentation coefficient of 1.53 S, corresponding to a molecular mass of 12.8 kDa.
